# Supplementary material for: Targeting tumor-associated macrophages as a novel strategy against breast cancer
Source: JCI journal article supplement (doi:10.1172/jci27648), 2006-07-21
Supplement: sd1 [file 1]

Supplemental Figure. Legumain specific CD8<sup>+</sup> CTL induced by the pLegumain based DNA vaccine

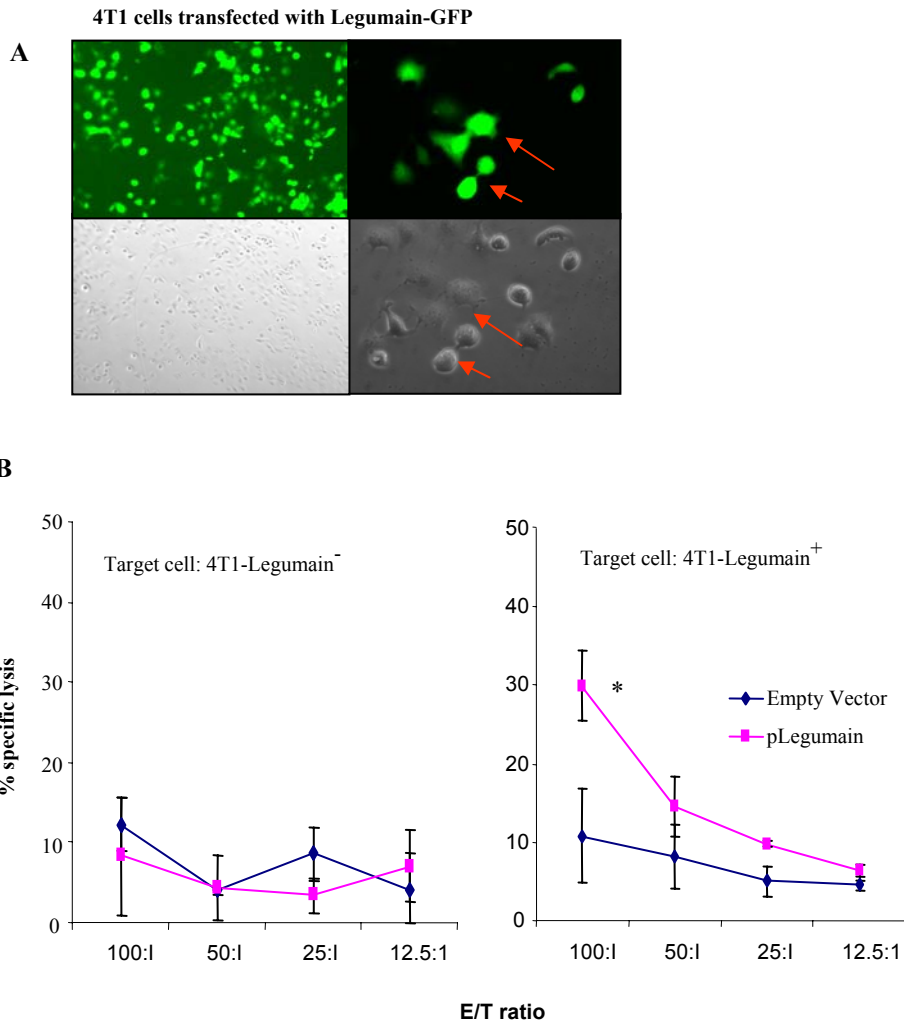

### Figure legend of supplemental data

The 4T1 cell line was stably transfected by a retrovirus harboring the Legumain plasmid and then used as a target cells (Fig supplemental A, left panel x 5; right panel x 35 at magnification), the image was taken 2 days after transfection and the positive cell was indicated by arrows. The  $^{51}\text{Cr}$  release assay data are shown in supplement figure B. The splenocytes isolated from mice immunized with the pLegumain vaccine were effective in killing 4T1 cells stable transfected with Legumain by using the retrovirus system in vitro (\* $P < 0.01$ , compared to empty vector control groups). The tumor specific T cell-mediated killing was specific for Legumain since 4T1 cells, lacking in Legumain expression, were not lysed
